# Supplementary material for: Anticancer Activity of (±)-Kusunokinin Derivatives towards Cholangiocarcinoma Cells
Source: MDPI journal article supplement (doi:10.3390/molecules27238291), 2022-11-28

<sup>1</sup>H NMR spectrum of 4-(3,4-dimethoxybenzyl)-3-(4-hydroxy-3-methoxybenzyl)dihydro furan-2(3H)-one: (±)-TTPG-A

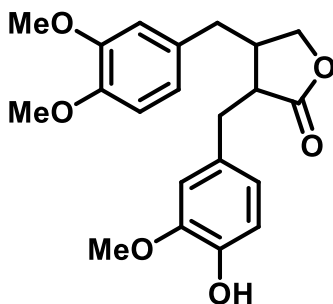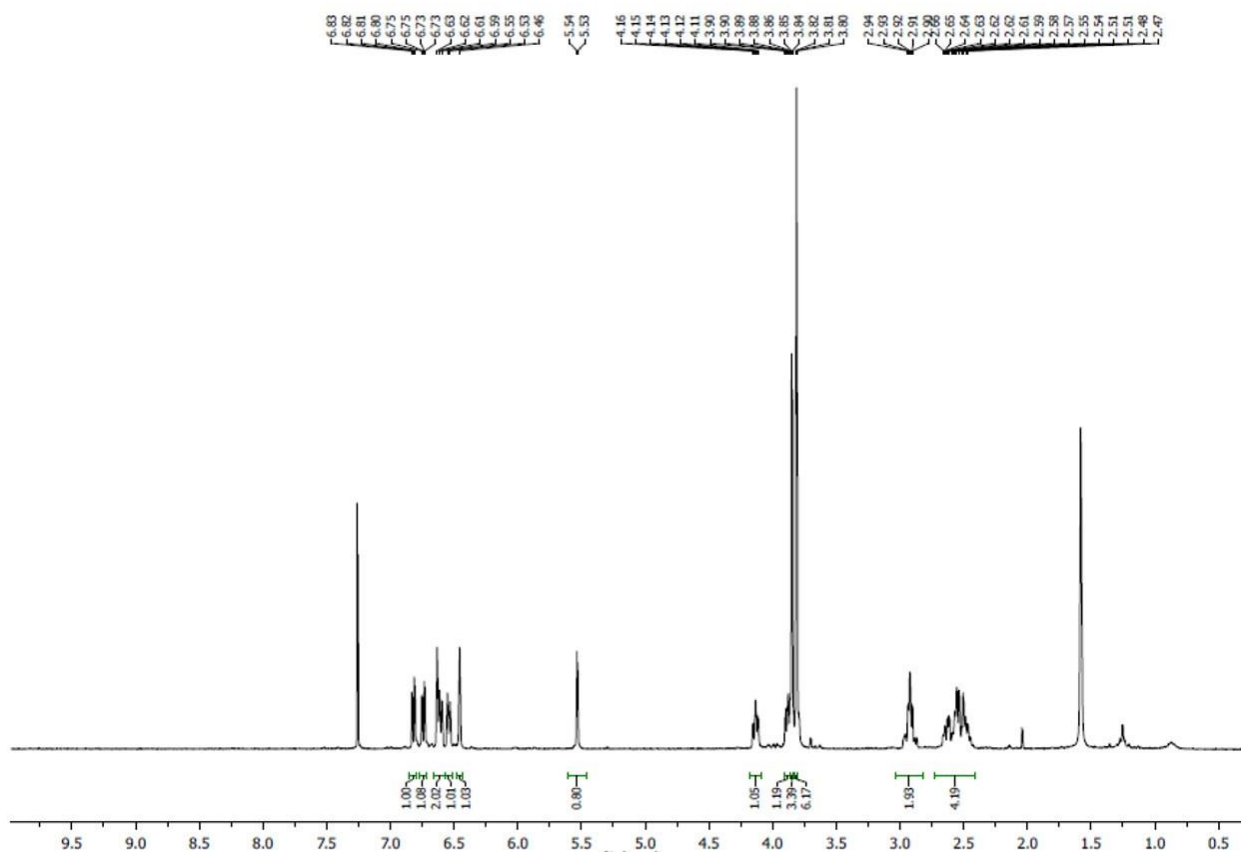

<sup>13</sup>C NMR spectrum of 4-(3,4-dimethoxybenzyl)-3-(4-hydroxy-3-methoxybenzyl)dihydro furan-2(3H)-one: (±)-TTPG-A

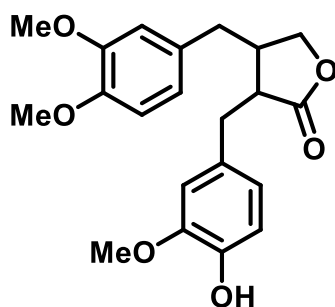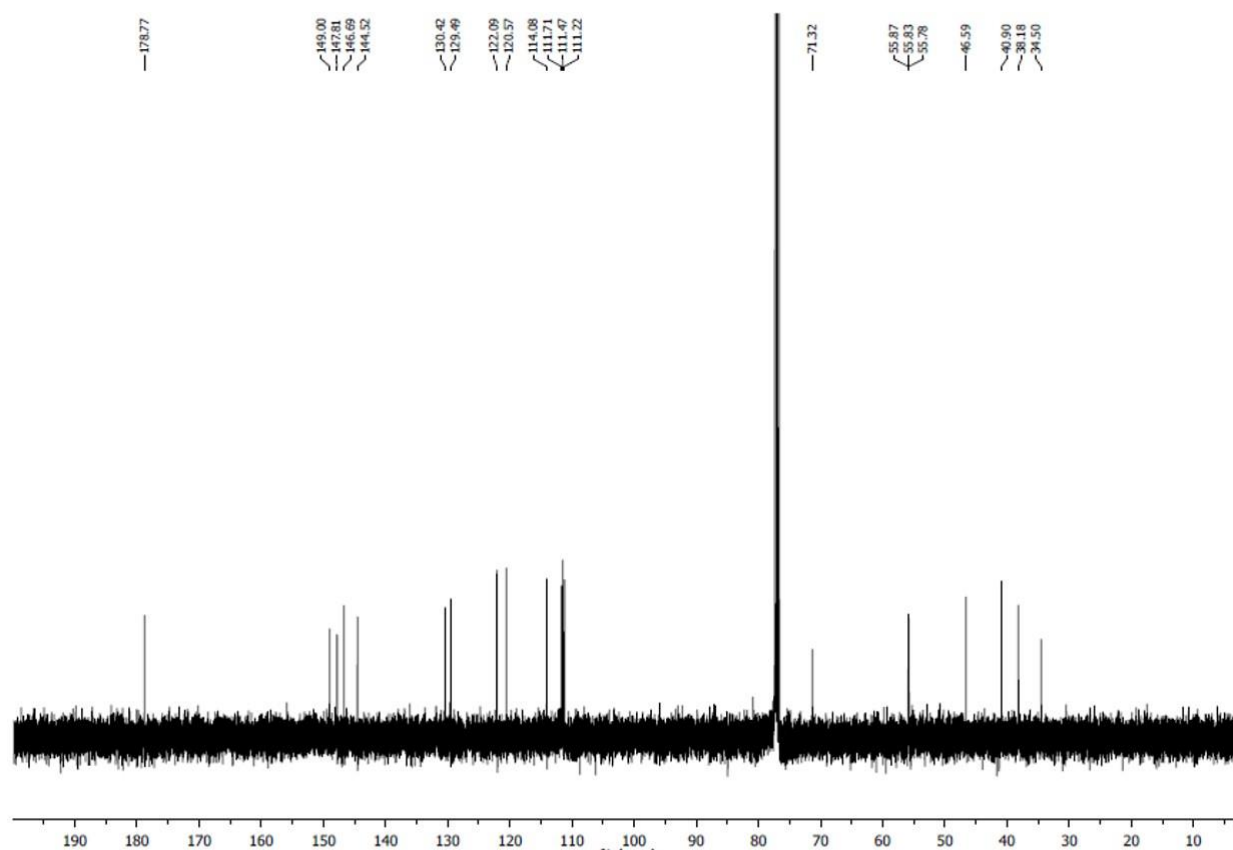

**HRMS spectrum of 4-(3,4-dimethoxybenzyl)-3-(4-hydroxy-3-methoxybenzyl)dihydro furan-2(3H)-one: (+)-TTPG-A**

|               |                                                          |              |                |           |
|---------------|----------------------------------------------------------|--------------|----------------|-----------|
| Analysis Name | \\10.222.72.169\Data\chawaneel\OMe_OMe_OH_OMe_hydro re.d | Operator     | Sutichai       | Ext: 3560 |
| Method        | NaFormate_pos low.m                                      | Instrument   | micrOTOF       | Bruker    |
| Sample Name   | OMe_OMe_OH_OMe_hydro re                                  | Calibrate by | Sodium Formate |           |

**Acquisition Parameter**

|             |            |                      |          |                  |           |
|-------------|------------|----------------------|----------|------------------|-----------|
| Source Type | ESI        | Ion Polarity         | Positive | Set Nebulizer    | 0.4 Bar   |
| Focus       | Not active |                      |          | Set Dry Heater   | 180 °C    |
| Scan Begin  | 50 m/z     | Set Capillary        | 4500 V   | Set Dry Gas      | 5.0 l/min |
| Scan End    | 3000 m/z   | Set End Plate Offset | -500 V   | Set Divert Valve | Source    |

**Spectrum View**

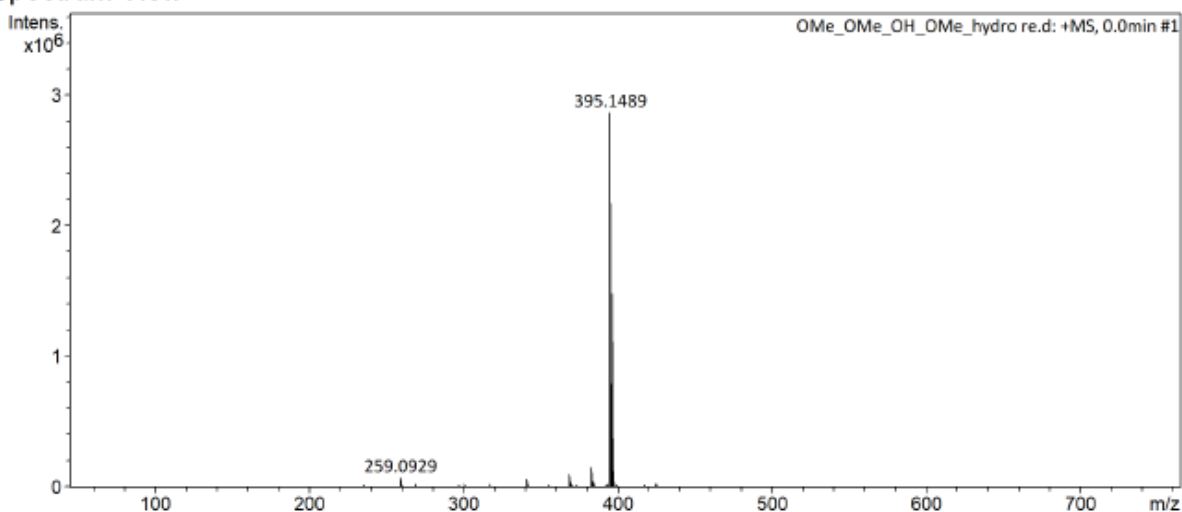

**Compound Spectra**

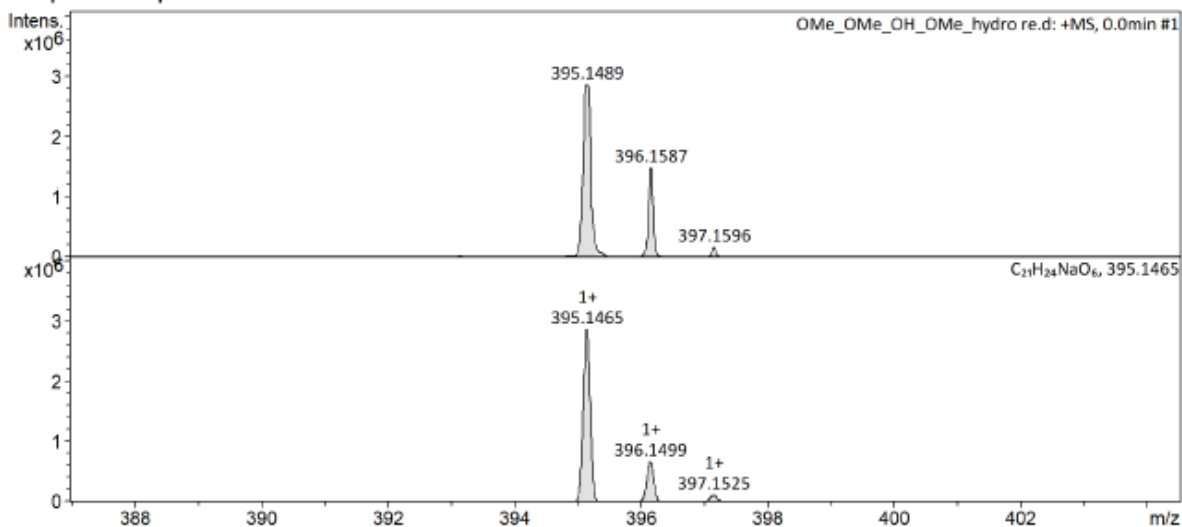

**$^1\text{H}$  NMR spectrum of 4-(4-butoxy-3-methoxybenzyl)-3-(4-hydroxy-3-methoxybenzyl) dihydrofuran-2(3H)-one: ( $\pm$ )-TTPG-B**

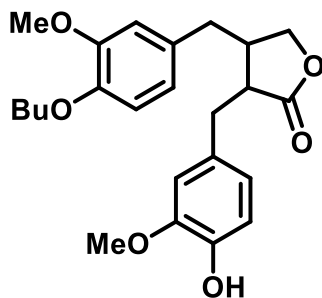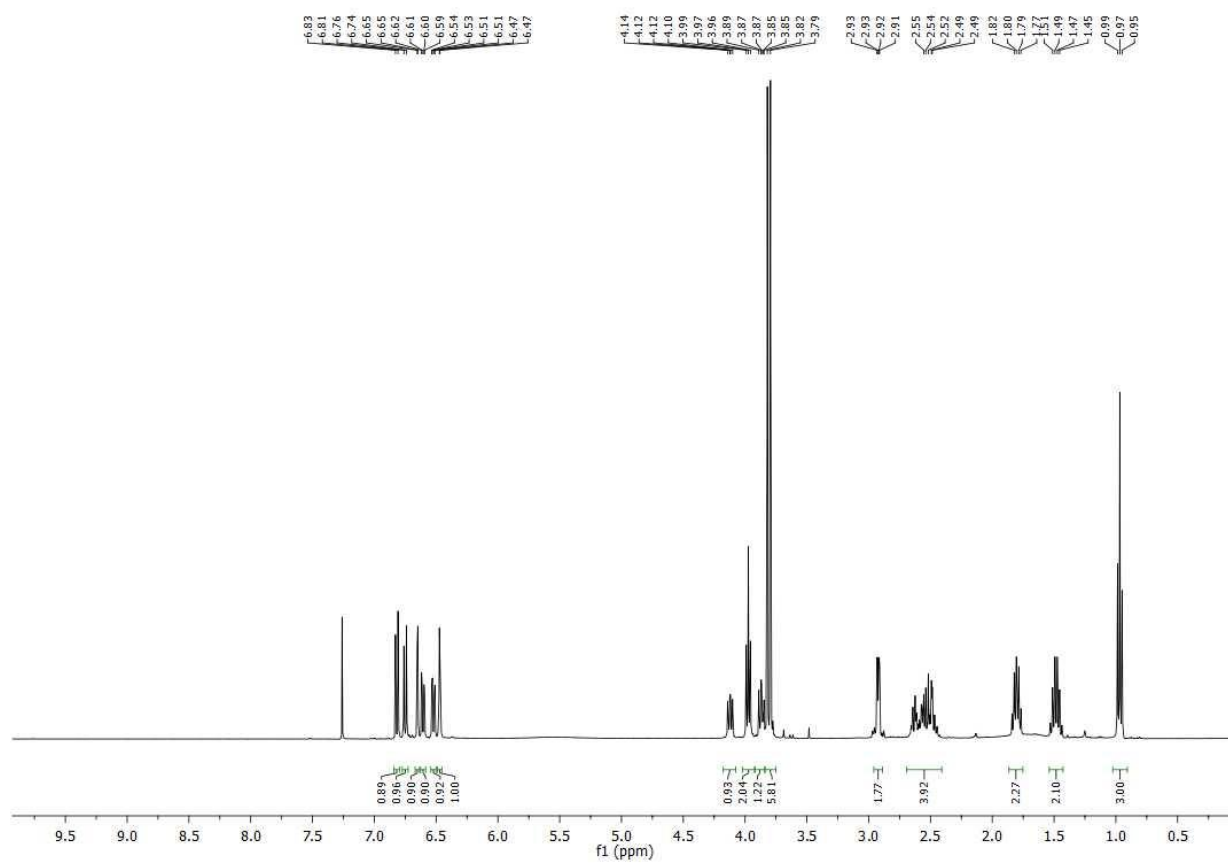

**$^{13}\text{C}$  NMR spectrum of 4-(4-butoxy-3-methoxybenzyl)-3-(4-hydroxy-3-methoxybenzyl) dihydrofuran-2(3H)-one: ( $\pm$ )-TTPG-B**

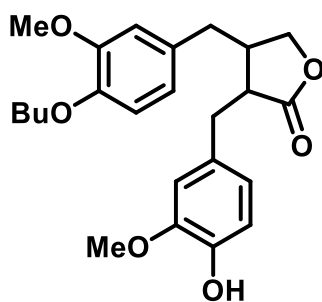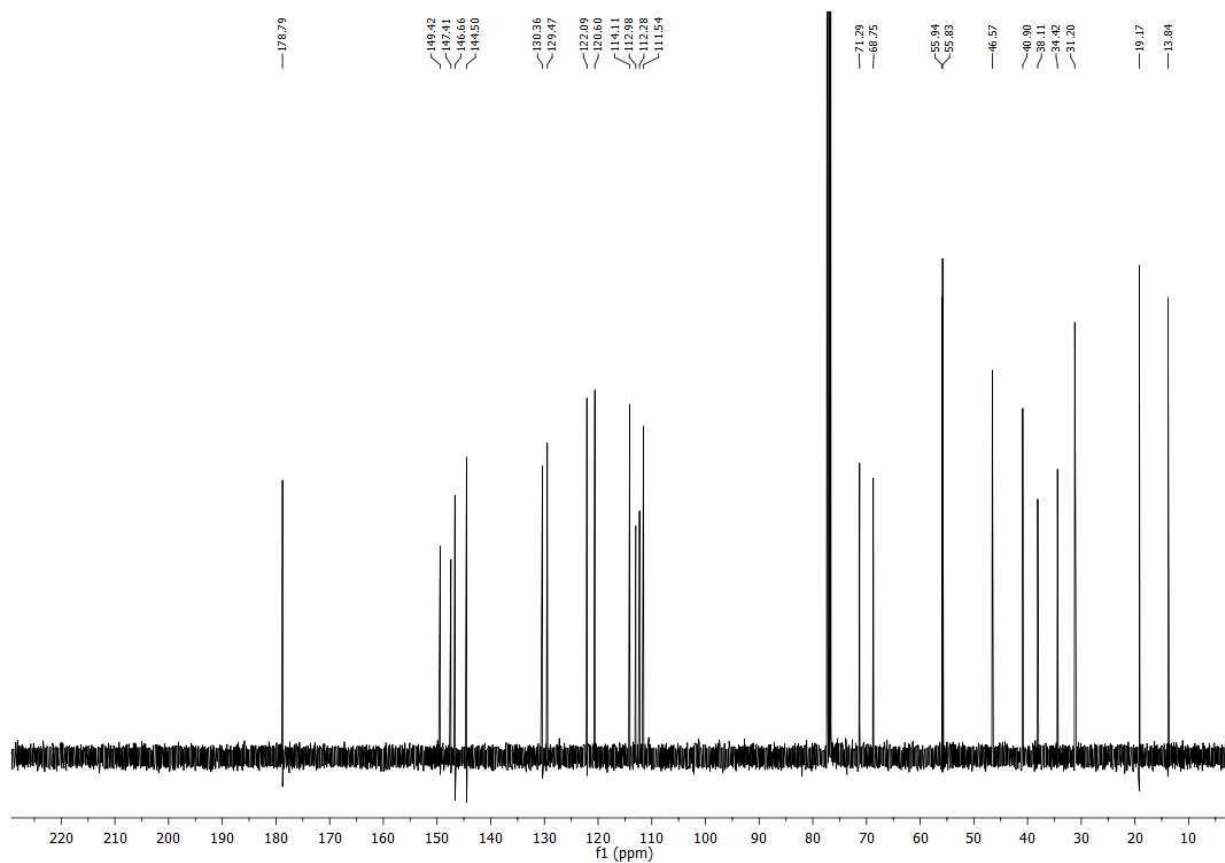

**HRMS spectrum of 4-(4-butoxy-3-methoxybenzyl)-3-(4-hydroxy-3-methoxybenzyl)  
dihydrofuran-2(3H)-one: ( $\pm$ )-TTPG-B**

|               |                                                                |              |                |           |
|---------------|----------------------------------------------------------------|--------------|----------------|-----------|
| Analysis Name | \\10.222.72.169\Data\chawaneel\OMe OBU OMe OH final hydro re.d | Operator     | Sutichai       | Ext: 3560 |
| Method        | NaFormate_pos low.m                                            | Instrument   | micrOTOF       | Bruker    |
| Sample Name   | OMe OBU OMe OH final hydro re                                  | Calibrate by | Sodium Formate |           |

**Acquisition Parameter**

|             |            |                      |          |                  |           |
|-------------|------------|----------------------|----------|------------------|-----------|
| Source Type | ESI        | Ion Polarity         | Positive | Set Nebulizer    | 0.4 Bar   |
| Focus       | Not active |                      |          | Set Dry Heater   | 180 °C    |
| Scan Begin  | 50 m/z     | Set Capillary        | 4500 V   | Set Dry Gas      | 5.0 l/min |
| Scan End    | 3000 m/z   | Set End Plate Offset | -500 V   | Set Divert Valve | Source    |

**Spectrum View**

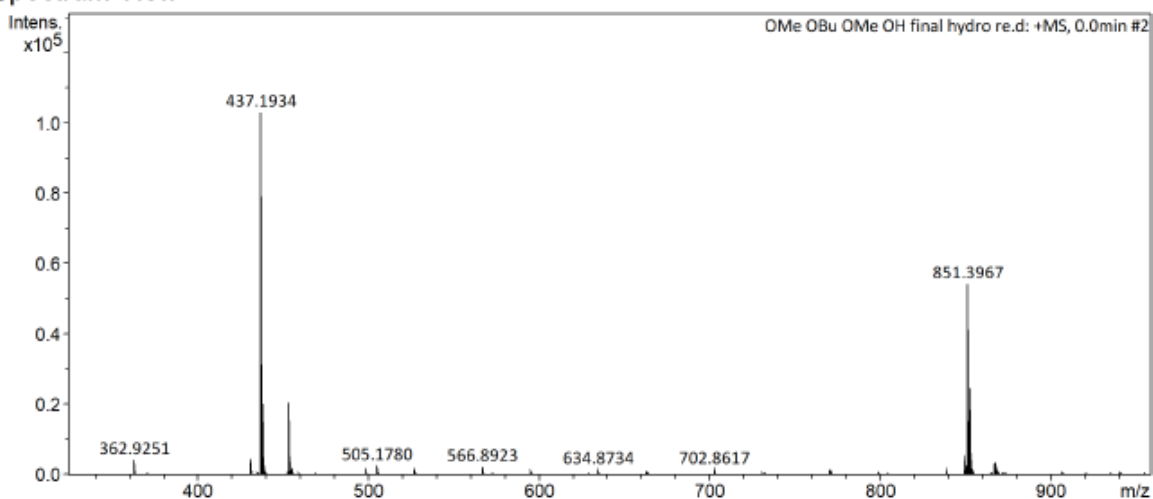

**Compound Spectra**

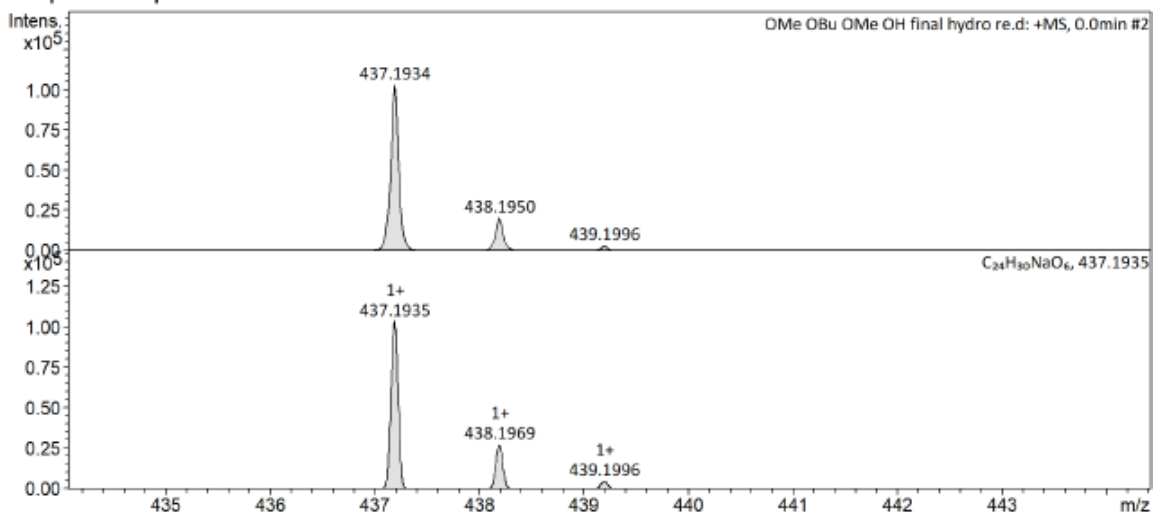

Supplement: s1 [file s1]
